# Supplementary material
Source: publisher figshare collection journal article supplement (https://sage.figshare.com/ndownloader/files/17682383)
Supplement: Supplementary file 1 [file 17682383]

## Supplementary Materials

### Sensitivity Analyses – Median Regression Models

| Discharging diagnosis             | Cost of Inpatient Hospitalization                             |         |
|-----------------------------------|---------------------------------------------------------------|---------|
|                                   | Adjusted <sup>a</sup> Median Difference <sup>b</sup> (95% CI) | P Value |
| <b>CHF (N=154,816)</b>            | \$3,712 (3,363 - 4,062)                                       | <0.001  |
| <b>COPD (N=108,017)</b>           | \$2,008 (1,711 - 2,305)                                       | <0.001  |
| <b>DM (N=66,456)</b>              | \$2,031 (1,700 - 2,362)                                       | <0.001  |
| <b>All Admission (N= 588,375)</b> | \$2,430 (2,296 - 2,564)                                       | <0.001  |

<sup>a</sup> Adjusted by age, gender, race, number of chronic conditions, hospital region, teaching vs. non-teaching hospital, and hospital location. In the model for the all admission, we also included 2-way interactions between diagnosis and the individual variables described in the manuscript.

<sup>b</sup> With PIV complication vs. without PIV complication.
